# Supplementary material for: Ammonia synthesis from nitrogen and steam using electrochemical cells with a hydrogen-permeable membrane and Ru/Cs+/C catalysts
Source: Royal Society of Chemistry journal article supplement (doi:10.1039/d3se01527k), 2024-01-01
Supplement: d3se01527k1.pdf [file d3se01527k1.pdf]

## Electronic Supplementary Information

### Ammonia synthesis from nitrogen and steam using electrochemical cell with hydrogen-permeable membrane and Ru/Cs<sup>+</sup>/C catalysts

Shintaroh Nagaishi<sup>a</sup>, Rika Hayashi<sup>a</sup>, Aika Hirata<sup>a</sup>, Raisei Sagara<sup>a</sup> and Jun Kubota<sup>\*a</sup>

a. Department of Chemical Engineering, Fukuoka University, 8-19-1, Nanakuma, Jonan-ku, Fukuoka 814-0180, Japan.

\* E-mail: jkubota@fukuoka-u.ac.jp (Jun Kubota)

#### Elemental analysis of electrolyte after NH<sub>3</sub> synthesis

To investigate the cause of degradation in the electrochemical cell, the electrolyte after synthesis of NH<sub>3</sub> using the electrochemical cell for several days was investigated using X-ray fluorescence analysis (XRF, Malvern Panalytical Epsilon 1). The cell was disassembled, and the cathode and anode were peeled off from the electrolyte disk. Elemental analysis using XRF was conducted on both sides of the electrolyte disk. Table S1 presents the elemental composition ratios obtained by XRF. Elements constituting the electrolyte, specifically Si, P, and Cs, were detected on both the cathode and anode sides. Ti was detected on both sides, but the amount was notably higher at 64% on the anode side. This suggests that Ti leached out from the Pt-plated Ti-sintered fibres used in the anode substrate into the electrolyte. For a more stable and prolonged operation, it was suggested that a more precious metal is required for the anode substrate.

#### The NH<sub>3</sub> production rate with varying H<sub>2</sub>/N<sub>2</sub> ratio

In our previous report,<sup>15</sup> we investigated the optimum flow rate of N<sub>2</sub> for NH<sub>3</sub> synthesis using the electrochemical system and found the

appropriate H<sub>2</sub>/N<sub>2</sub> ratio from the current density, where Ru catalysts supported on MgO or CeO<sub>2</sub> were investigated. However, in this work, carbon-based materials were studied for the supports of Ru catalysts. It is necessary to confirm whether the optimal ratio found in the previous paper, H<sub>2</sub>/N<sub>2</sub> = 0.07, is applicable to the catalysts in this study. The deviation of optimal H<sub>2</sub>/N<sub>2</sub> ratio from the stoichiometric ratio of 3 is attributed to the fact that the ammonia synthesis reaction is negative-order the NH<sub>3</sub> formation rate of with respect to the partial pressure of H<sub>2</sub>. However, there is a possibility that the poisoning effect on hydrogen is dependent on the catalyst type.

Therefore, investigated NH<sub>3</sub> synthesis from mixtures of N<sub>2</sub> and H<sub>2</sub> with varying the H<sub>2</sub>/N<sub>2</sub> ratio using a vertical fixed-bed reactor with 30wt%-Ru/Cs<sup>+</sup>/VXC72R. The Fig. S1 illustrates the NH<sub>3</sub> production rates at 250°C and 0.1 MPa with varying the H<sub>2</sub>/N<sub>2</sub> ratio. The H<sub>2</sub> flow rate was set at 1.0 or 2.0 cm<sup>3</sup><sub>STP</sub> min<sup>-1</sup>, while the N<sub>2</sub> flow rate was varied as stated H<sub>2</sub>/N<sub>2</sub> ratios. NH<sub>3</sub>

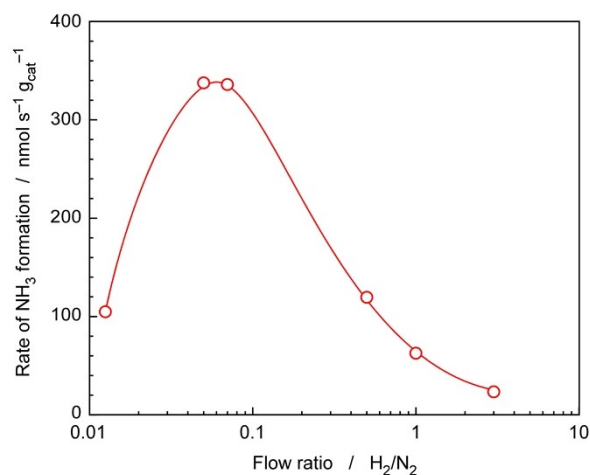

Fig. S1. Dependence of rate of NH<sub>3</sub> formation on the flow ratio of H<sub>2</sub>/N<sub>2</sub> at 250°C and 0.1 MPa using a vertical fixed-bed reactor with 30 wt%-Ru/Cs<sup>+</sup>/VXC72R.

**Table S1.** Elemental composition ratios of the electrolyte after electrochemical synthesis.

| Element | Elemental composition / atom% |            |
|---------|-------------------------------|------------|
|         | Cathode side                  | Anode side |
| Si      | 9                             | 1          |
| P       | 22                            | 18         |
| Ti      | 5                             | 64         |
| Cs      | 64                            | 10         |
| Pt      | 0                             | 7          |

production rates were in the range of 336 to 338 nmol s<sup>-1</sup> g<sup>-1</sup> at H<sub>2</sub>/N<sub>2</sub> ratios of 0.07 to 0.05, with the maximum production rate achieved. The optimal H<sub>2</sub>/N<sub>2</sub> ratio of Ru catalyst supported on the carbon material was almost similar to that supported on MgO or CeO<sub>2</sub>.
